# Supplementary material for: Determinants of adherence to COVID-19 preventive behaviours in Canada: Results from the iCARE Study
Source: bioRxiv or medRxiv preprint supplement (doi:10.1101/2021.06.09.21258634), 2021-06-13
Supplement: Supplementary file [file media-1.pdf]

## Supplement 1 - methods

### Component structure of the iCARE concerns module:

To cluster COVID-19-related concerns, we performed a principal component analysis (PCA) on a polychoric correlation matrix of the 14 (Survey 1) and 18 (Survey 2) variables in the COVID-19 concerns module (ordinal scale). An orthogonal (varimax) rotation was done in order to distribute the factor loadings. We identified concern patterns based on the Kaiser criterion (eigenvalue>1.0), scree plot, and components interpretability.<sup>11</sup> Items with loadings higher than 0.4 were used to interpret each component of COVID-19 concerns. We observed a three-factor structure that included: **‘Health concerns’** (items: *being infected myself; the impact of being infected on my health, including dying; infecting other people I live with; a person with whom I live with being infected; a family member with whom I do not share my home being infected; a friend with whom I do not share my home being infected; infecting other people in the community*), **‘Personal financial concerns’** (items: *losing my job / family income; losing my / family savings; not having enough money for food and/or rent; there not being enough food left on shelves for people to eat*), **‘Social/economic concerns’** (items: *being isolated from other people; my country going into an economic recession/depression; how long it will take for things to go back to normal*).

**Supplement 2 – Table S1. Overall frequency of awareness of the recommended preventive behaviours (presenting frequency and percentage of individuals that responded yes) by survey**

|                                                                     | Survey 1- April, 2020<br>(N=3003) |               | Survey 2- June 2020<br>(N=3005) |               |
|---------------------------------------------------------------------|-----------------------------------|---------------|---------------------------------|---------------|
|                                                                     | Unweighted<br>N (%)               | Weighted<br>% | Unweighted<br>N (%)             | Weighted<br>% |
| <b>Awareness</b>                                                    |                                   |               |                                 |               |
| <i>Hand washing with soap and water</i>                             | 2917 (97.9)                       | 98.1          | 2920 (98.2)                     | 98.1          |
| <i>Staying at least 6 feet or 1-2 metres away from other people</i> | 2903 (97.6)                       | 97.6          | 2932 (98.5)                     | 98.4          |
| <i>Self-quarantining if you are returning from a trip</i>           | 2870 (97.2)                       | 97.3          | 2873 (97.8)                     | 97.6          |
| <i>Self-isolating if you have or believe you have the virus</i>     | 2887 (97.4)                       | 97.5          | 2890 (97.9)                     | 97.8          |
| <i>Avoiding any non-essential travel</i>                            | 2908 (97.8)                       | 97.8          | 2863 (96.7)                     | 96.5          |
| <i>Avoiding social gatherings</i>                                   | 2847 (96.6)                       | 96.7          | 1979 (67.9)                     | 68.1          |

**Supplement 2 – Table S2. Overall frequency of COVID-19 related concerns (presenting frequency and percentage of individuals concerned *To a great extent*) by survey**

| Concern                                                                | Survey 1- April, 2020<br>(N=3003) |               | Survey 2- June 2020<br>(N=3005) |               |
|------------------------------------------------------------------------|-----------------------------------|---------------|---------------------------------|---------------|
|                                                                        | Unweighted<br>N (%)               | Weighted<br>% | Unweighted N<br>(%)             | Weighted<br>% |
| <i>Being infected myself</i>                                           | 1072 (36.1)                       | 36.3          | 862 (29.2)                      | 29.7          |
| <i>The impact of being infected on my health, including dying</i>      | 1136 (38.3)                       | 38.4          | 942 (31.9)                      | 32.6          |
| <i>Being isolated from other people</i>                                | 729 (24.6)                        | 24.6          | 678 (23.1)                      | 23.1          |
| <i>Losing my job / family income</i>                                   | 826 (31.8)                        | 31.9          | 648 (26.6)                      | 26.7          |
| <i>Losing my / family savings</i>                                      | 945 (32.7)                        | 32.4          | 761 (26.7)                      | 26.8          |
| <i>Not having enough money for food and/or rent</i>                    | 724 (24.9)                        | 25.0          | 571 (19.8)                      | 19.9          |
| <i>Infecting other people I live with</i>                              | 1084 (40.5)                       | 40.7          | 931 (35.2)                      | 35.6          |
| <i>A person with whom I live with being infected</i>                   | 1155 (43.6)                       | 43.7          | 1038 (39.3)                     | 39.2          |
| <i>A family member with whom I do not share my home being infected</i> | 1367 (47.1)                       | 47.1          | 1210 (41.9)                     | 42.0          |
| <i>Infecting other people in the community</i>                         | 942 (32.2)                        | 32.2          | 852 (29.2)                      | 29.5          |

|                                                                                      |             |      |             |      |
|--------------------------------------------------------------------------------------|-------------|------|-------------|------|
| <i>There not being enough food left on shelves for people to eat</i>                 | 592 (20)    | 20.2 | 407 (13.8)  | 13.8 |
| <i>My country going into an economic recession/depression</i>                        | 1414 (47.7) | 47.6 | 1123 (38.1) | 38.3 |
| <i>How long it will take for things to go back to normal</i>                         | 1512 (50.9) | 50.7 | 1260 (42.8) | 43.0 |
| <i>A friend with whom I do not share my home being infected</i>                      | 803 (28)    | 28.3 | NA          | NA   |
| <i>Not being able to see my friends, socialise</i>                                   | NA          | NA   | 688 (23.9)  | 23.2 |
| <i>A family member I don't live with being socially isolated</i>                     | NA          | NA   | 785(27.7)   | 27.8 |
| <i>The healthcare system becoming overloaded/not being able to care for the sick</i> | NA          | NA   | 1073 (36.3) | 36.5 |
| <i>There being a second wave of COVID-19 infections in the future</i>                | NA          | NA   | 1399 (47.2) | 47.7 |

NA = not measured
